# Supplementary material for: Ce3+ sensitized bright white light emission from colloidal Ln3+ doped CaF2 nanocrystals for the development of transparent nanocomposites
Source: Royal Society of Chemistry journal article supplement (doi:10.1039/c6tc00756b), 2016-01-01
Supplement: c6tc00756b1.pdf [file c6tc00756b1.pdf]

**Supporting Information**

**Ce<sup>3+</sup> sensitized bright white light emission from colloidal Ln<sup>3+</sup> doped CaF<sub>2</sub>  
nanocrystals for developing transparent nanocomposites**

Venkata N. K. B. Adusumalli, Murthy Koppiseti and Venkataramanan Mahalingam\*

---

\* mvenkataramanan@yahoo.com

## Experimental Section:

**Materials.**  $\text{Tm}_2\text{O}_3$ ,  $\text{Tb}_2\text{O}_3$  (99.99%, from Aldrich),  $\text{Ce}(\text{NO}_3)_3 \cdot 6\text{H}_2\text{O}$ ,  $\text{Sm}(\text{NO}_3)_3 \cdot 6\text{H}_2\text{O}$  (99.9%, from Aldrich),  $\text{NH}_4\text{F}$  (98%, from Aldrich) Citric Acid (CA) (99%, from sigma),  $\text{Ca}(\text{NO}_3)_2 \cdot 4\text{H}_2\text{O}$  (98%, from Merck),  $\text{HNO}_3$  (1M, 70%, from Merck), and Distilled water were used for the Synthesis. All chemicals were used without further purification.

**Synthesis .** Citric Acid (CA) - coated  $\text{CaF}_2:\text{Ce}^{3+}(\text{x}\% \text{Tm}^{3+}(\text{0}\% \text{or } \text{1}\%)/\text{Tb}^{3+}(\text{y}\%)/\text{Sm}^{3+}(\text{z}\%)[\text{x} = 0, 15, 20, 25, \text{y} = 0, 0.1, 0.09, 0.08, 0.07, 0.06, 0.05, 0.0, \text{z} = 0.06, 0.5, 0.4, 0.37, 0.35, 0.3]$  nano crystals were synthesized using microwave (MW) procedure. Briefly, various stoichiometric amounts of  $\text{Tm}_2\text{O}_3$ ,  $\text{Tb}_2\text{O}_3$  were converted to their corresponding nitrates by dissolving in 1N nitric acid whereas  $\text{Ca}(\text{NO}_3)_2 \cdot 4\text{H}_2\text{O}$ ,  $\text{Sm}(\text{NO}_3)_2 \cdot 6\text{H}_2\text{O}$ ,  $\text{Ce}(\text{NO}_3)_3 \cdot 6\text{H}_2\text{O}$ , citric acid (CA) and ammonium fluoride ( $\text{NH}_4\text{F}$ ) were used as received. In a typical procedure  $\text{Ca}(\text{NO}_3)_2 \cdot 4\text{H}_2\text{O}$  (0.786mmol),  $\text{Ce}(\text{NO}_3)_3 \cdot 6\text{H}_2\text{O}$  (0.20mmol),  $\text{Tm}(\text{NO}_3)_3$  (0.01mmol),  $\text{Tb}(\text{NO}_3)_3$  (0.0006mmol),  $\text{Sm}(\text{NO}_3)_3 \cdot 6\text{H}_2\text{O}$  (0.0035mmol) were taken in a 100 ml beaker and dissolved in 15ml of distilled water. Citric acid (4mmol/10ml distilled water) was added slowly to the above nitrate mixture and vigorously stirred at room temperature for 1 hour. Then  $\text{NH}_4\text{F}$  (2.5mmol /5ml) taken in excess stoichiometric amount was added drop wise and stirred for 30 minutes. Subsequently, the colloidal solution was transferred into a 30ml glass vial used for microwave synthesis (Anton Parr Monowave 300 microwave reactor under temperature control mode). The vial was tightly sealed with teflon cap and microwave heated at  $150^\circ\text{C}$  for 15 minutes. The final product obtained as white precipitate was collected by centrifugation and washed thrice with distilled water, to remove any unreacted reactants, impurities dried under vacuum.

### Characterization techniques:

*X-Ray diffraction study (XRD):* The XRD patterns were collected using the Rigaku-Smart Lab diffractometer attached with a D/tex ultra-detector and a  $\text{Cu-K}_\alpha$  source operating at 35 kV and 70 mA. The scan range was set from  $10-90^\circ$  ( $2\theta$ ) with a step size of  $0.02^\circ$  and a count time of 2 sec. The samples were well powdered and spread evenly on a quartz slide.

*Transmission electron microscopy (TEM):* Transmission electron microscopy (TEM) images were taken using ultrahigh resolution FEG-TEM (JEOL JEM 2100F) with a 200 kV electron source and for imaging a drop of the nanocrystals dispersion was taken on a carbon coated 300 mesh Cu grid and dried in air.

*Scanning electron microscopy (SEM):* Field emission scanning electron microscopy (FESEM) images were collected on The SUPRA 55-VP JSM-With patented GEMINI column technology. Prior to loading the samples into the chamber, they were coated with a thin film of gold in order to avoid charging effects.

*Fourier transform infrared spectroscopy (FTIR):* The FTIR spectra were recorded using Perkin Elmer Spectrometer RX1 spectrophotometer with KBr disk technique in the range of  $4000-400\text{ cm}^{-1}$ . For recording the FTIR spectra 10 mg of the samples were mixed with 200 mg of KBr to make the pellets.

*Thermogravimetric analysis (TGA):* Thermogravimetric analysis was performed using Mettler Toledo TGA 851 instrument under  $\text{N}_2$  atmosphere at a heating rate of  $10^\circ\text{ min}^{-1}$ .

*Photoluminescence study (PL):* The room temperature photoluminescence spectra were recorded using a Horiba Jobin Yvon Fluorolog spectrophotometer equipped with a 450 W Xe lamp. The photoluminescence lifetime measurements were performed with Horiba Jobin Yvon Fluorolog machine equipped with a pulsed Xe source operating at a power of 25 W. The absolute quantum yield measurement was performed using the integrating sphere purchased from Edinburgh Instruments. The sphere was placed in Edinburgh Instruments' FLSP 920 system, having a 450 W Xe lamp as excitation source. Red sensitive PMT was used as the detector.

*Time resolved fluorescence study:* The time resolved fluorescence studies were performed using Horiba Jobin Yvon time correlated single photon counting (TCSPC) set up with picoseconds resolution. The excitation source was a 280 nm Nano LED with 500 ps detection time resolution. Fluorescence emission was monitored at  $\lambda = 330\text{nm}$ .

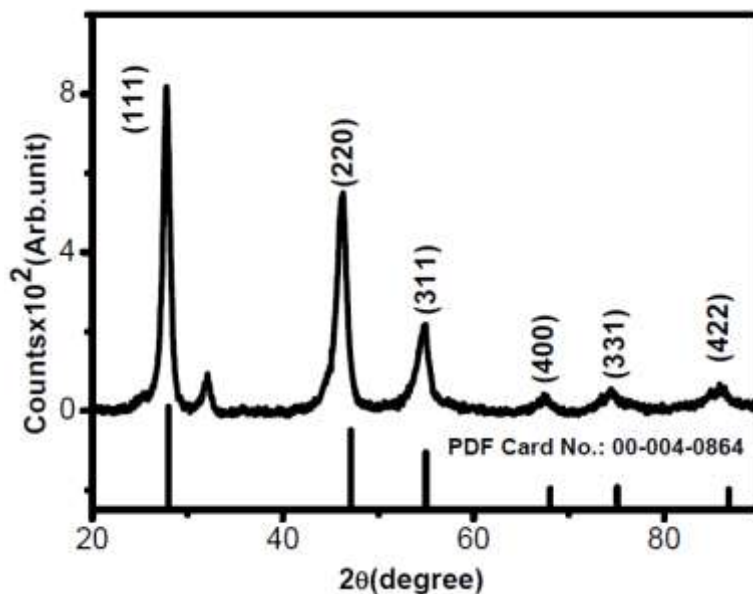

**Figure.S1** Power X-Ray diffraction (XRD) patterns of  $\text{CaF}_2:\text{Ce}^{3+}$  (20%)/ $\text{Tm}^{3+}$  (1%)/ $\text{Tb}^{3+}$  (0.06%) / $\text{Sm}^{3+}$  (0.3%) nanocrystals.

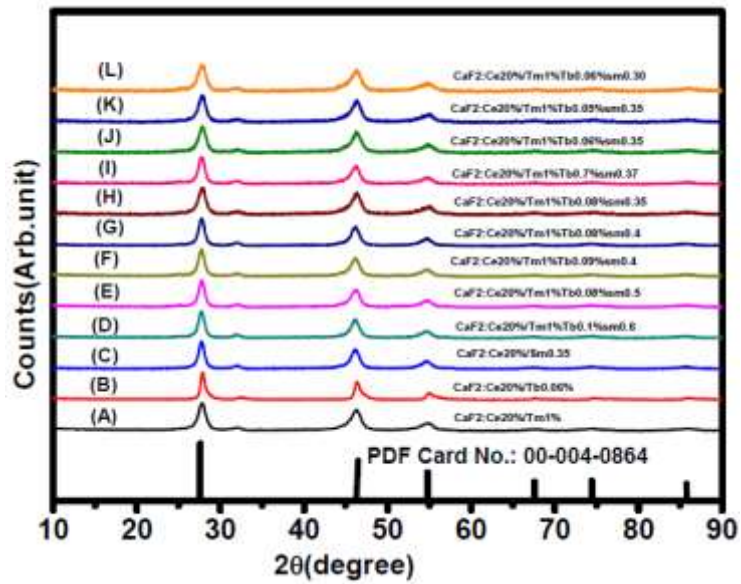

**Figure.S2** The XRD pattern for CaF<sub>2</sub>:Ce<sup>3+</sup> (20%)/Tm<sup>3+</sup>(X %), Tb<sup>3+</sup> (Y %) and Sm<sup>3+</sup> (Z %) NCs. [x= 0, 1; y= 0, 0.1, 0.08, 0.09, 0.07, 0.06, 0.05; Z=0, 0.6, 0.5, 0.4, 0.37, 0.35, 0.30].

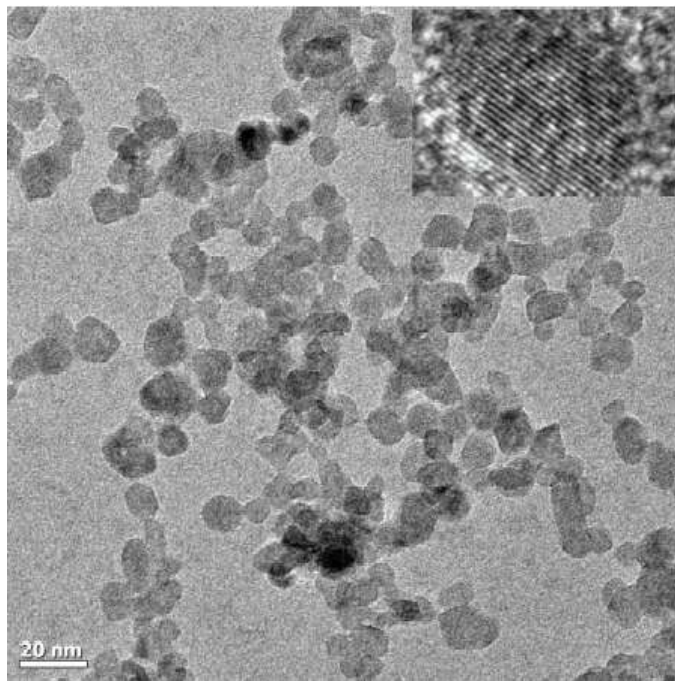

**Figure.S3** HRTEM images of CA-capped Ce<sup>3+</sup>/Tm<sup>3+</sup>/Tb<sup>3+</sup>/Sm<sup>3+</sup>-doped CaF<sub>2</sub> nanocrystals.

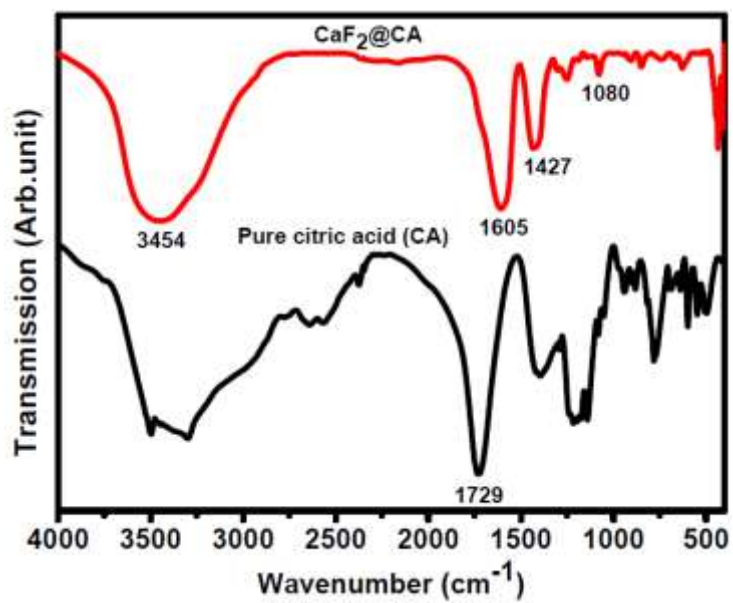

**Figure.S4** FTIR spectra of CA alone and the same coated over CaF<sub>2</sub> nanocrystals.

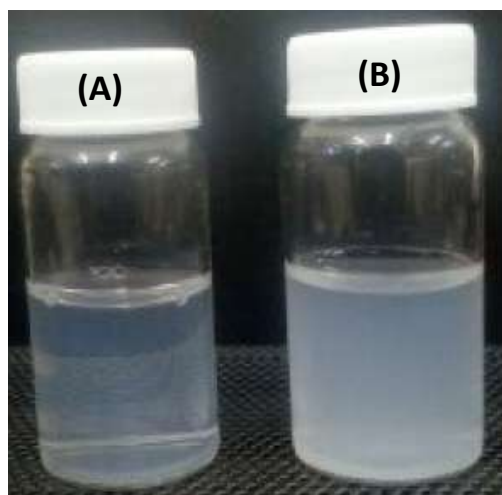

**Figure.S5** Digital image of Ce<sup>3+</sup>/Tm<sup>3+</sup>/Tb<sup>3+</sup>/Sm<sup>3+</sup>-doped CaF<sub>2</sub> nanocrystals (A) with CA capping and (B) without capping agent.

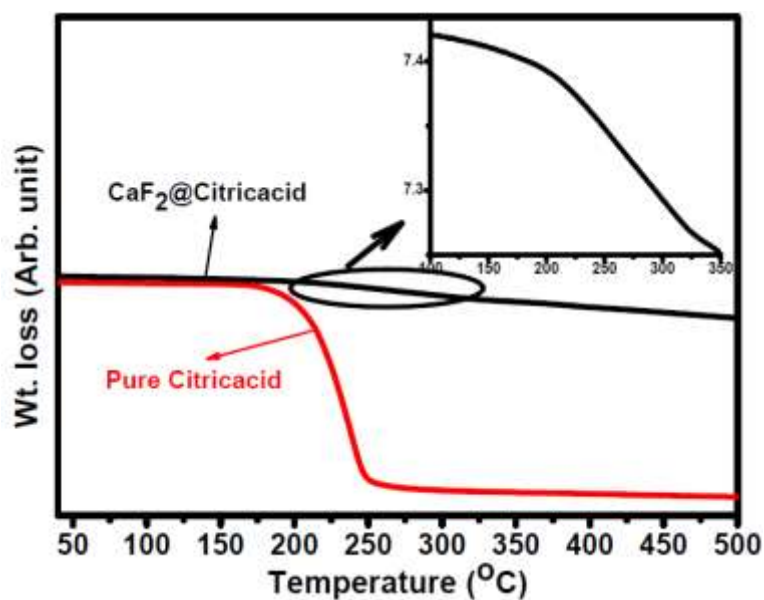

**Figure.S6** Thermo gravimetric analysis (TGA) curves of CA (solid trace) and CA-coated  $\text{Ce}^{3+}/\text{Tm}^{3+}/\text{Tb}^{3+}/\text{Sm}^{3+}$ - $\text{CaF}_2$  (dotted trace) nanocrystals.

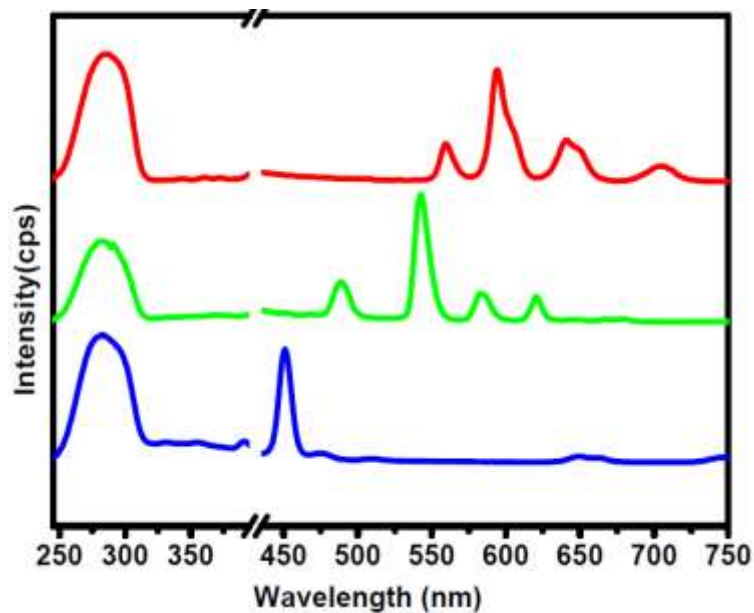

**Figure.S7** PL spectra of  $\text{CaF}_2$ - $\text{Ce}^{3+}$  (20%)/  $\text{Tm}^{3+}$  (1%) (blue trace),  $\text{CaF}_2$  - $\text{Ce}^{3+}$  (20%)  $\text{Tb}^{3+}$  0.06%) (green trace)  $\text{CaF}_2$ - $\text{Ce}^{3+}$  (20%)  $\text{Sm}^{3+}$  (0.3%) (red trace), nanocrystals.

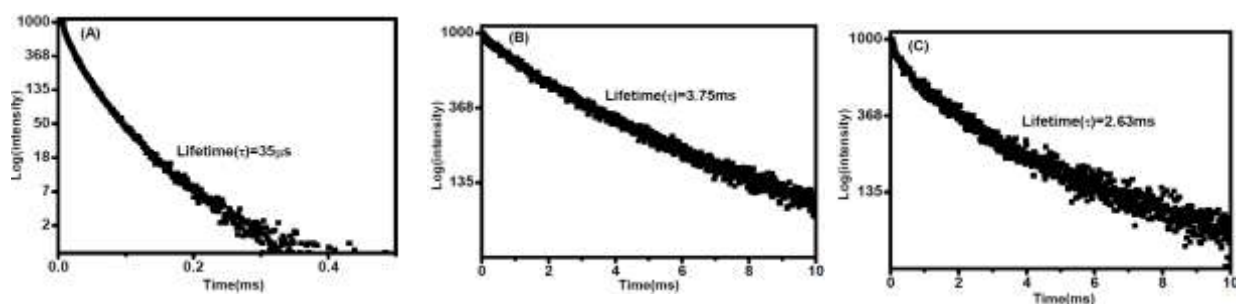

**Figure.S8** Photoluminescence decay curves of  $\text{Ce}^{3+}/(20\%)/\text{Tm}^{3+}(1\%)/\text{Tb}^{3+}0.06\%/\text{Sm}^{3+}$ - $\text{CaF}_2$  nanocrystals measured after exciting at 280 nm. The emission collected for  $\text{Tm}^{3+}$  450nm (A), for  $\text{Tb}^{3+}$  542nm (B) and for  $\text{Sm}^{3+}$  594nm emissions.

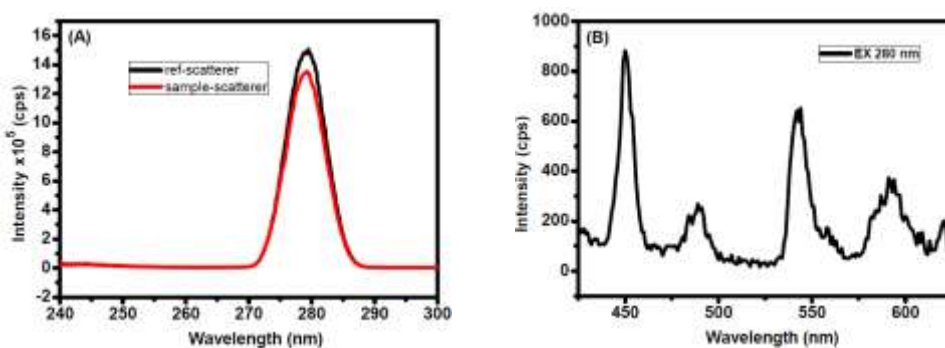

**Figure .S9** Excitation (A) and emission spectra (B) of  $\text{Ce}^{3+}/(20\%)/\text{Tm}^{3+}(1\%)/\text{Tb}^{3+}0.06\%/\text{Sm}^{3+}$ - $\text{CaF}_2$  nanocrystals measured in the integrating sphere.

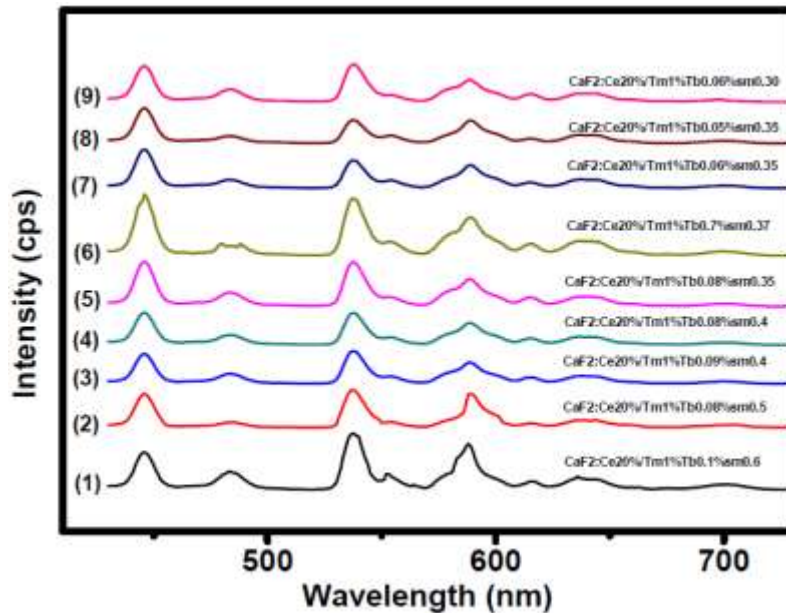

**Figure.S10** Emission spectra of CaF<sub>2</sub>-Ce<sup>3+</sup> 20% and different concentration of Tm<sup>3+</sup> (x %) /Tb<sup>3+</sup> (y %) / Sm<sup>3+</sup> (z %) doped nanocrystals. The  $\lambda_{ex}$  is 280 nm.

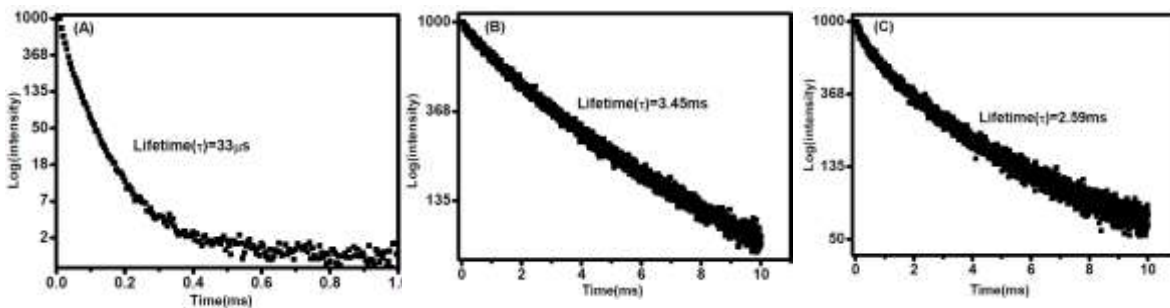

**Figure S11.** Photoluminescence decay curves of Ce<sup>3+</sup> / (20%) / Tm<sup>3+</sup> (1%) / Tb<sup>3+</sup> 0.06% / Sm<sup>3+</sup> -CaF<sub>2</sub> nanocomposite film measured after exciting at 280 nm. The emission peaks collected for Tm<sup>3+</sup> is 450nm (A), for Tb<sup>3+</sup> is 542nm (B) and for Sm<sup>3+</sup> is 594nm (C).



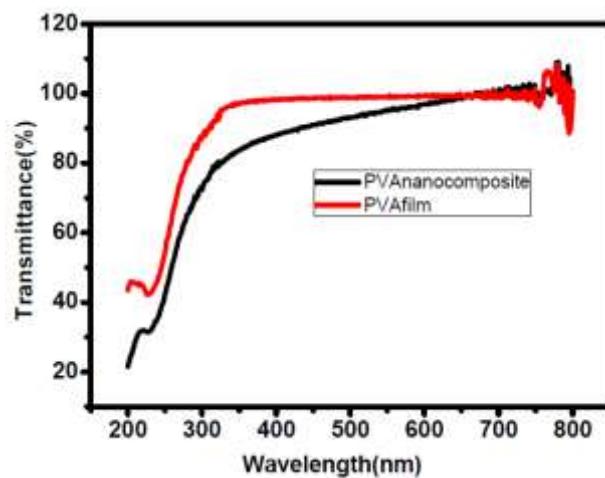

**Figure.S12** Transmittance spectra of pure PVA film and PVA nanocomposite film.

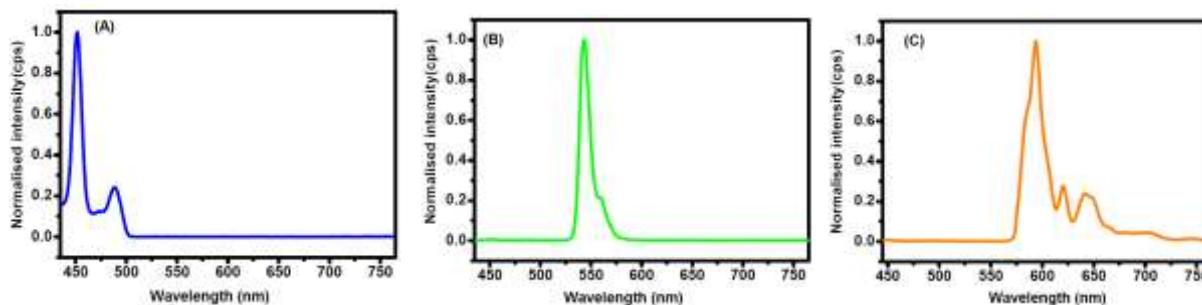

**Figure.S13** PL spectra of  $\text{CaF}_2\text{-Ce}^{3+}/\text{Tm}^{3+}/\text{Tb}^{3+}/\text{Sm}^{3+}$  nanocrystals measured using RGB colour filters. (A) spectrum with blue filter (500 nm short pass filter), (B) spectrum with green filter (530 nm-570nm band pass filter) and (C) spectrum with red filter (570 nm long pass filter).
